# Supplementary material for: A Biochemical and Pharmacological Characterization of Phospholipase A2 and Metalloproteinase Fractions from Eastern Russell’s Viper (Daboia siamensis) Venom: Two Major Components Associated with Acute Kidney Injury
Source: MDPI journal article supplement (doi:10.3390/toxins13080521), 2021-07-26
Supplement: s1 [file s1]

# Supplementary Materials: A Biochemical and Pharmacological Characterization of Phospholipase A<sub>2</sub> and Metalloproteinase Fractions from Eastern Russell's Viper (*Daboia siamensis*) Venom: Two Major Components Associated with Acute Kidney Injury

Janeyuth Chaisakul, Orawan Khow, Kulachet Wiwatwarayos, Muhamad Rusdi Ahmad Rusmili, Watcharamon Prasert, Iekhsan Othman, Syafiq Asnawi Zainal Abidin, Mongkon Charoenpitakchai, Wayne C. Hodgson, Lawan Chanhom and Narongsak Chaiyabutr

Supplementary Data S1: Sequence of RvMP

- a. Protein identification for RvMP. Q7LZ61 was determined to be the identity of the heavy chain subunit identity and Q4PRD1 was determined as light chain subunit identity. The determination was made based on analysis of -10lgP value, number of unique peptides and matched origin species.

| Protein Group | Protein ID | Accession                              | -10lgP | Coverage (%) | Coverage (%) SVMP | Area SVMP | #Peptides | #Unique | #Spec SVMP | PTM | Avg. Mass | Description                                                                                       |
|---------------|------------|----------------------------------------|--------|--------------|-------------------|-----------|-----------|---------|------------|-----|-----------|---------------------------------------------------------------------------------------------------|
| 1             | 21019      | <a href="#">Q7LZ61 VM3CX_DABSI</a>     | 209.89 | 26           | 26                | 0         | 29        | 11      | 119        | Y   | 69648     | Coagulation factor X-activating enzyme heavy chain OS=Daboia siamensis PE=1 SV=2                  |
| 2             | 21020      | <a href="#">tr K9JAW0 K9JAW0_DABRR</a> | 189.84 | 29           | 29                | 0         | 23        | 5       | 96         | Y   | 69521     | Factor X activator heavy chain OS=Daboia russelii PE=2 SV=1                                       |
| 3             | 21021      | <a href="#">Q4PRD1 SLLC1_DABSI</a>     | 149.91 | 36           | 36                | 0         | 9         | 9       | 36         | Y   | 16871     | Snaclec coagulation factor X-activating enzyme light chain 1 OS=Daboia siamensis GN=LC1 PE=1 SV=2 |
| 5             | 21022      | <a href="#">tr T1P647 T1P647_9SAUR</a> | 121.68 | 42           | 42                | 0         | 10        | 2       | 22         | Y   | 18324     | Factor X activator light chain 2 OS=Daboia russelii PE=2 SV=1                                     |
| 7             | 21036      | <a href="#">tr K9JDJ1 K9JDJ1_DABSI</a> | 108.36 | 52           | 52                | 0         | 10        | 2       | 15         | Y   | 18479     | Factor X activator light chain 2 OS=Daboia siamensis PE=2 SV=1                                    |
| 9             | 21042      | <a href="#">tr K9JCB2 K9JCB2_DABRR</a> | 104.50 | 18           | 18                | 0         | 3         | 2       | 8          | Y   | 18273     | Factor X activator light chain 2 OS=Daboia russelii PE=2 SV=1                                     |

- i. Matched peptides for RvMP heavy chain subunit (Q7LZ61).

## Supporting Peptides:

| Peptide                                                                        | Uniq | -10lgP | Mass          | Length | ppm   | m/z      | z | RT   | Scan | Area SVMP | #Feature | #Feature SVMP | Start | End | PTM                                                   | Found By  |
|--------------------------------------------------------------------------------|------|--------|---------------|--------|-------|----------|---|------|------|-----------|----------|---------------|-------|-----|-------------------------------------------------------|-----------|
| R.ANVAKDSC(+57.02)FQENLKG<br>SYYGYC(+57.02)R.K                                 | Y    | 62.51  | 2629.<br>1689 | 22     | -8.7  | 877.3893 | 3 | 7.42 | 1680 | 0         | 0        | 0             | 518   | 539 | Carbamid<br>omethyla<br>tion                          | PEAKS DB  |
| K.DSC(+57.02)FQENLKGSYYGY<br>C(+57.02)R.K                                      | N    | 59.31  | 2145.<br>8884 | 17     | -3.2  | 716.3011 | 3 | 7.83 | 1802 | 0         | 0        | 0             | 523   | 539 | Carbamid<br>omethyla<br>tion                          | PEAKS DB  |
| R.ANVAKDSC(+57.02)FQENLK.<br>G                                                 | Y    | 55.11  | 1622.<br>7722 | 14     | 2.1   | 812.3951 | 2 | 5.86 | 1184 | 0         | 0        | 0             | 518   | 531 | Carbamid<br>omethyla<br>tion                          | PEAKS DB  |
| R.ARDEC(+57.02)DVPEHC(+57.<br>02)TGQSAEC(+57.02)PRDQLQQ<br>NGKPC(+57.02)QNNR.G | Y    | 51.44  | 4053.<br>7283 | 34     | 6.3   | 811.7581 | 5 | 5.02 | 912  | 0         | 0        | 0             | 462   | 495 | Carbamid<br>omethyla<br>tion                          | PEAKS DB  |
| K.LKPGAEC(+57.02)GNGLC(+5<br>7.02)C(+57.02)YQC(+57.02)K.<br>I                  | N    | 50.91  | 2013.<br>8529 | 17     | -1.7  | 672.2905 | 3 | 5.69 | 1127 | 0         | 0        | 0             | 435   | 451 | Carbamid<br>omethyla<br>tion                          | PEAKS DB  |
| K.LKPGAEC(+57.02)GN(+.98)G<br>LC(+57.02)C(+57.02)YQC(+57<br>.02)K.I            | N    | 49.78  | 2014.<br>8369 | 17     | 0.2   | 672.6197 | 3 | 5.85 | 1177 | 0         | 0        | 0             | 435   | 451 | Carbamid<br>omethyla<br>tion;<br>Deamidat<br>ion (NQ) | PEAKS PTM |
| R.ANVAKDS(-<br>18.01)C(+57.02)FQENLKGSYYG<br>YC(+57.02)R.K                     | Y    | 49.40  | 2611.<br>1584 | 22     | -10.9 | 653.7898 | 4 | 7.47 | 1692 | 0         | 0        | 0             | 518   | 539 | Dehydrat<br>ion;<br>Carbamid<br>omethyla<br>tion      | PEAKS PTM |
| R.ANVAKDSC(+57.02)FQENLKG<br>SYYGYC(+57.02)RK.E                                | Y    | 48.03  | 2757.<br>2639 | 23     | -15.8 | 552.4514 | 5 | 6.94 | 1523 | 0         | 0        | 0             | 518   | 540 | Carbamid<br>omethyla<br>tion                          | PEAKS DB  |
| K.DSC(+57.02)FQENLKGSYYGY<br>C(+57.02)RK.E                                     | N    | 46.62  | 2273.<br>9834 | 18     | 0.9   | 759.0024 | 3 | 7.31 | 1643 | 0         | 0        | 0             | 523   | 540 | Carbamid<br>omethyla<br>tion                          | PEAKS DB  |
| K.DSC(+57.02)FQENLK.G                                                          | N    | 46.22  | 1139.<br>4917 | 9      | -3.1  | 570.7513 | 2 | 6.05 | 1245 | 0         | 0        | 0             | 523   | 531 | Carbamid<br>omethyla<br>tion                          | PEAKS DB  |
| R.LFC(+57.02)LNNSPR.N                                                          | N    | 46.06  | 1119.<br>5494 | 9      | 3.8   | 560.7841 | 2 | 8.34 | 1952 | 0         | 0        | 0             | 558   | 566 | Carbamid<br>omethyla<br>tion                          | PEAKS DB  |

| Peptide                                                       | Uniq | -10lgP | Mass      | Length | ppm   | m/z      | z | RT    | Scan | Area SVMP | #Feature | #Feature SVMP | Start | End | PTM                                    | Found By  |
|---------------------------------------------------------------|------|--------|-----------|--------|-------|----------|---|-------|------|-----------|----------|---------------|-------|-----|----------------------------------------|-----------|
| R.NQC(+57.02)ISLFGSRANVAK DSC(+57.02)FQENLK.G                 | Y    | 44.27  | 2785.3276 | 24     | -3.3  | 697.3369 | 4 | 9.14  | 2193 | 0         | 0        | 0             | 508   | 531 | Carbamidomethylation                   | PEAKS DB  |
| R.NQC(+57.02)ISLFGSRANVAK DSC(+57.02)FQENLKGSYYGYC(+57.02)R.K | Y    | 43.75  | 3791.7241 | 32     | 7.6   | 948.9456 | 4 | 9.52  | 2313 | 0         | 0        | 0             | 508   | 539 | Carbamidomethylation                   | PEAKS DB  |
| R.N(+27.99)QC(+57.02)ISLFGSR.A                                | N    | 43.73  | 1208.5608 | 10     | -2.9  | 605.2859 | 2 | 9.41  | 2277 | 0         | 0        | 0             | 508   | 517 | Formylation; Carbamidomethylation      | PEAKS PTM |
| K.SHDNALLFTDMR.F                                              | N    | 43.66  | 1418.6613 | 12     | -5.9  | 710.3337 | 2 | 9.14  | 2194 | 0         | 0        | 0             | 282   | 293 |                                        | PEAKS DB  |
| K.SHDNALLFTDM(+15.99)R.F                                      | N    | 43.35  | 1434.6561 | 12     | -4.4  | 718.3322 | 2 | 7.56  | 1723 | 0         | 0        | 0             | 282   | 293 | Oxidation (M)                          | PEAKS PTM |
| R.SVEIVQEQR.N                                                 | Y    | 43.28  | 1257.6313 | 11     | -2.6  | 629.8213 | 2 | 5.76  | 1148 | 0         | 0        | 0             | 313   | 323 |                                        | PEAKS DB  |
| R.SVEIVQEQRNFK.T                                              | Y    | 41.84  | 1646.8376 | 14     | -3.1  | 824.4235 | 2 | 6.08  | 1253 | 0         | 0        | 0             | 313   | 326 |                                        | PEAKS DB  |
| R.ANVAKD(-18.01)SC(+57.02)FQENLKGSYYGYC(+57.02)R.K            | Y    | 40.85  | 2611.1584 | 22     | -10.5 | 653.7900 | 4 | 7.49  | 1698 | 0         | 0        | 0             | 518   | 539 | Dehydration; Carbamidomethylation      | PEAKS PTM |
| R.NQC(+57.02)ISLFGSR.A                                        | N    | 40.29  | 1180.5659 | 10     | -5.1  | 591.2872 | 2 | 8.43  | 1977 | 0         | 0        | 0             | 508   | 517 | Carbamidomethylation                   | PEAKS DB  |
| R.LFC(+57.02)LN(+.98)NSPR.N                                   | N    | 40.10  | 1120.5336 | 9      | 5.3   | 561.2770 | 2 | 8.31  | 1944 | 0         | 0        | 0             | 558   | 566 | Carbamidomethylation; Deamidation (NQ) | PEAKS PTM |
| R.L(+27.99)FC(+57.02)LNNSPR.N                                 | N    | 39.12  | 1147.5444 | 9      | -5.6  | 574.7763 | 2 | 10.56 | 2623 | 0         | 0        | 0             | 558   | 566 | Formylation; Carbamidomethylation      | PEAKS PTM |

| Peptide                                                                      | Uniq | -10lgP | Mass      | Length | ppm   | m/z      | z | RT   | Scan | Area SVMP | #Feature | #Feature SVMP | Start | End | PTM                                     | Found By  |
|------------------------------------------------------------------------------|------|--------|-----------|--------|-------|----------|---|------|------|-----------|----------|---------------|-------|-----|-----------------------------------------|-----------|
| N.VAKDSC(+57.02)FQENLKGSY YGYC(+57.02)R.K                                    | N    | 38.29  | 2444.0889 | 20     | -28.5 | 815.6804 | 3 | 7.88 | 1817 | 0         | 0        | 0             | 520   | 539 | Carbamidomethylation                    | PEAKS DB  |
| R.ARDEC(+57.02)DVPEHC(+57.02)TGQSAEC(+57.02)PRDQLQQN(+.98)GKPC(+57.02)QNNR.G | Y    | 37.14  | 4054.7122 | 34     | 5.6   | 811.9542 | 5 | 5.14 | 957  | 0         | 0        | 0             | 462   | 495 | Carbamidomethylation; Deamidation (NQ)  | PEAKS PTM |
| R.KIPC(+57.02)APQDVKC(+57.02)GR.L                                            | N    | 36.91  | 1527.7650 | 13     | 2.1   | 510.2634 | 3 | 4.86 | 862  | 0         | 0        | 0             | 545   | 557 | Carbamidomethylation                    | PEAKS DB  |
| R.KIPC(+57.02)APQDVK.C                                                       | N    | 36.61  | 1154.6117 | 10     | 0.8   | 578.3136 | 2 | 5.07 | 933  | 0         | 0        | 0             | 545   | 554 | Carbamidomethylation                    | PEAKS DB  |
| R.GYC(+57.02)YNGDC(+57.02)PIMR.N                                             | N    | 36.46  | 1504.5897 | 12     | -5.9  | 753.2977 | 2 | 7.04 | 1553 | 0         | 0        | 0             | 496   | 507 | Carbamidomethylation                    | PEAKS DB  |
| S.Q(-17.03)LVSTSAQFNK.I                                                      | N    | 36.44  | 1204.6088 | 11     | -2.3  | 603.3103 | 2 | 7.90 | 1823 | 0         | 0        | 0             | 188   | 198 | Pyro-glutamine from Q                   | PEAKS PTM |
| R.KSHDNALLFTDMR.F                                                            | N    | 35.58  | 1546.7562 | 13     | 3.3   | 516.5944 | 3 | 8.33 | 1947 | 0         | 0        | 0             | 281   | 293 |                                         | PEAKS DB  |
| K.LKPGAEC(+57.02)GNGLC(+57.02)C(+57.02)YQC(+57.02)KIK.T                      | N    | 35.58  | 2255.0320 | 19     | -2.3  | 564.7640 | 4 | 6.22 | 1302 | 0         | 0        | 0             | 435   | 453 | Carbamidomethylation                    | PEAKS DB  |
| K.SHDNALLFTDMR(+43.04).F                                                     | N    | 34.81  | 1461.7034 | 12     | -31.4 | 488.2264 | 3 | 7.78 | 1790 | 0         | 0        | 0             | 282   | 293 | Carboxyl modification with ethanolamine | PEAKS PTM |
| R.KSHDNALLFTDMR(+43.04).F                                                    | N    | 34.30  | 1589.7983 | 13     | -26.7 | 795.8853 | 2 | 7.11 | 1579 | 0         | 0        | 0             | 281   | 293 | Carboxyl modification with ethanolamine | PEAKS PTM |
| R.KSHDNALLFTDM(+15.99)R.F                                                    | N    | 33.62  | 1562.7511 | 13     | 3.2   | 521.9260 | 3 | 6.85 | 1495 | 0         | 0        | 0             | 281   | 293 | Oxidation (M)                           | PEAKS PTM |
| R.S(+27.99)VEIVQEQRNFK.T                                                     | Y    | 33.62  | 1674.8325 | 14     | -7.9  | 838.4169 | 2 | 7.60 | 1734 | 0         | 0        | 0             | 313   | 326 | Formylation                             | PEAKS PTM |

| Peptide                                                                 | Uniq | -10lgP | Mass      | Length | ppm  | m/z      | z | RT   | Scan | Area SVMP | #Feature | #Feature SVMP | Start | End | PTM                                                         | Found By  |
|-------------------------------------------------------------------------|------|--------|-----------|--------|------|----------|---|------|------|-----------|----------|---------------|-------|-----|-------------------------------------------------------------|-----------|
| K.C(-18.01)GRLFC(+57.02)LNNSPR.N                                        | N    | 32.74  | 1417.6707 | 12     | 10.4 | 709.8500 | 2 | 7.59 | 1732 | 0         | 0        | 0             | 555   | 566 | Dehydration (C@N-term); Carbamidomethylation                | PEAKS PTM |
| R.N(+27.99)QC(+57.02)ISLFGSRANVAK.D                                     | Y    | 30.39  | 1691.8413 | 15     | -0.1 | 846.9279 | 2 | 9.08 | 2172 | 0         | 0        | 0             | 508   | 522 | Formylation; Carbamidomethylation                           | PEAKS PTM |
| K.IPC(+57.02)APQDVKC(+57.02)GR.L                                        | N    | 30.22  | 1399.6700 | 12     | 3.9  | 467.5658 | 3 | 5.15 | 958  | 0         | 0        | 0             | 546   | 557 | Carbamidomethylation                                        | PEAKS DB  |
| R.RARDEC(+57.02)DVPEHC(+57.02)TGQSAEC(+57.02)PRDQLQQNGKPC(+57.02)QNNR.G | Y    | 29.59  | 4209.8291 | 35     | 5.7  | 842.9779 | 5 | 4.83 | 853  | 0         | 0        | 0             | 461   | 495 | Carbamidomethylation                                        | PEAKS DB  |
| K.LKPGAE(+57.02)CGNGLC(+57.02)C(+57.02)YQC(+57.02)K.I                   | N    | 29.24  | 2013.8529 | 17     | 2.4  | 672.2932 | 3 | 5.68 | 1122 | 0         | 0        | 0             | 435   | 451 | Carbamidomethylation (DHKE, X@N-term); Carbamidomethylation | PEAKS PTM |
| R.GYC(+57.02)YN(+.98)GDC(+57.02)PIMR.N                                  | N    | 28.89  | 1505.5737 | 12     | -3.3 | 753.7917 | 2 | 7.02 | 1550 | 0         | 0        | 0             | 496   | 507 | Carbamidomethylation; Deamidation (NQ)                      | PEAKS PTM |
| R.ANVAKDS(-18.01)C(+57.02)FQENLK.G                                      | Y    | 28.26  | 1604.7616 | 14     | 7.3  | 535.9317 | 3 | 5.95 | 1212 | 0         | 0        | 0             | 518   | 531 | Dehydration; Carbamidomethylation                           | PEAKS PTM |
| R.NQC(+57.02)ISLFGSRAN(+.98)VAKDSC(+57.02)FQENLKGSYGYC(+57.02)R.K       | Y    | 28.19  | 3792.7083 | 32     | 10.4 | 759.5568 | 5 | 9.50 | 2304 | 0         | 0        | 0             | 508   | 539 | Carbamidomethylation;                                       | PEAKS PTM |

| Peptide                                                       | Uniq | -10lgP | Mass      | Length | ppm   | m/z      | z | RT    | Scan | Area SVMP | #Feature | #Feature SVMP | Start | End | PTM                                                      | Found By  |
|---------------------------------------------------------------|------|--------|-----------|--------|-------|----------|---|-------|------|-----------|----------|---------------|-------|-----|----------------------------------------------------------|-----------|
|                                                               |      |        |           |        |       |          |   |       |      |           |          |               |       |     | Deamidation (NQ)                                         |           |
| R.GYC(+57.02)YN(+.98)GDC(+57.02)PIMRNQC(+57.02)ISLFGSR.A      | N    | 27.91  | 2668.1292 | 22     | 1.7   | 890.3851 | 3 | 10.45 | 2592 | 0         | 0        | 0             | 496   | 517 | Carbamidomethylation; Deamidation (NQ)                   | PEAKS PTM |
| R.GYC(+57.02)YNGDC(+57.02)PIM(-48.00)R.N                      | N    | 27.63  | 1456.5864 | 12     | 3.5   | 486.5378 | 3 | 5.54  | 1075 | 0         | 0        | 0             | 496   | 507 | Carbamidomethylation; Dethiomethyl                       | PEAKS PTM |
| R.ARDEC(+57.02)DVPEHC(+57.02)TGQSAEC(+57.02)PR.D              | Y    | 27.62  | 2372.9531 | 20     | -7.2  | 594.2413 | 4 | 4.20  | 738  | 0         | 0        | 0             | 462   | 481 | Carbamidomethylation                                     | PEAKS DB  |
| K.DSC(+57.02)FQENLKGSYYGYC(+57.02)RKEN(+.98)GR.K              | N    | 27.48  | 2731.1755 | 22     | -1.3  | 683.8003 | 4 | 7.11  | 1578 | 0         | 0        | 0             | 523   | 544 | Carbamidomethylation; Deamidation (NQ)                   | PEAKS PTM |
| R.GYC(+57.02)YNGDC(+57.02)PIMRNQC(+57.02)ISLFGSR.A            | N    | 27.35  | 2667.1450 | 22     | 0.2   | 890.0558 | 3 | 10.33 | 2559 | 0         | 0        | 0             | 496   | 517 | Carbamidomethylation                                     | PEAKS DB  |
| K.LKPGAEC(+57.02)GN(-17.03)GLC(+57.02)C(+57.02)YQC(+57.02)K.I | N    | 27.15  | 1996.8263 | 17     | 3.7   | 666.6185 | 3 | 6.12  | 1268 | 0         | 0        | 0             | 435   | 451 | Carbamidomethylation; Ammonia-loss (N)                   | PEAKS PTM |
| R.LFC(+57.02)LN(-17.03)NSPR.N                                 | N    | 26.31  | 1102.5229 | 9      | -6.0  | 552.2654 | 2 | 7.65  | 1749 | 0         | 0        | 0             | 558   | 566 | Carbamidomethylation; Ammonia-loss (N)                   | PEAKS PTM |
| R.ANVAK(+298.19)DSC(+57.02)FQENLKGSYYGYC(+57.02)R.K           | Y    | 25.63  | 2927.3621 | 22     | -27.7 | 732.8275 | 4 | 7.52  | 1710 | 0         | 0        | 0             | 518   | 539 | Levuglan dinityl-lysine anhydropyrrrole adduct; Carbamid | PEAKS PTM |

[illegible]

## ii. Matched peptides for RvMP light chain subunit (Q7LZ61).

| Peptide                                   | Uniq | -10lgP | Mass      | Length | ppm   | m/z      | z | RT    | Fraction | Scan     | Area SVMP | #Feature | #Feature SVMP | Start | End | PTM                                                         | Found By  |
|-------------------------------------------|------|--------|-----------|--------|-------|----------|---|-------|----------|----------|-----------|----------|---------------|-------|-----|-------------------------------------------------------------|-----------|
| A.VLDC(+57.02)PSGWLSYEQHC(+57.02)YK.G     | Y    | 61.43  | 2140.9346 | 17     | -4.2  | 714.6492 | 3 | 9.55  | 5        | 232<br>2 | 0         | 0        | 0             | 24    | 40  | Carbamidomethylation                                        | PEAKS DB  |
| K.ALAEESYC(+57.02)LIMITHEKEWK.S           | Y    | 56.33  | 2350.1338 | 19     | 1.6   | 784.3865 | 3 | 10.63 | 5        | 264<br>2 | 0         | 0        | 0             | 114   | 132 | Carbamidomethylation                                        | PEAKS DB  |
| K.S(+43.01)MTC(+57.02)NFIAPVVC(+57.02)K.F | Y    | 48.40  | 1568.7150 | 13     | 0.9   | 785.3655 | 2 | 8.79  | 5        | 208<br>7 | 0         | 0        | 0             | 133   | 145 | Carbamylation; Carbamidomethylation                         | PEAKS PTM |
| K.S(+71.04)MTC(+57.02)NFIAPVVC(+57.02)K.F | Y    | 46.97  | 1743.8147 | 14     | -22.4 | 872.8951 | 2 | 12.12 | 5        | 302<br>7 | 0         | 0        | 0             | 133   | 146 | Propionamide (K, X@N-term); Carbamidomethylation            | PEAKS PTM |
| K.YKALAEESYC(+57.02)LIMITHEKEWK.S         | Y    | 46.53  | 2641.2920 | 21     | -0.9  | 661.3297 | 4 | 10.56 | 5        | 262<br>2 | 0         | 0        | 0             | 112   | 132 | Carbamidomethylation                                        | PEAKS DB  |
| K.S(+43.01)MTC(+57.02)NFIAPVVC(+57.02)K.F | Y    | 45.04  | 1715.7833 | 14     | 4.1   | 572.9374 | 3 | 11.15 | 5        | 278<br>9 | 0         | 0        | 0             | 133   | 146 | Carbamylation; Carbamidomethylation                         | PEAKS PTM |
| K.SMTC(+57.02)NFIAPVVC(+57.02)K.F         | Y    | 41.93  | 1525.7091 | 13     | -2.1  | 763.8602 | 2 | 9.45  | 5        | 228<br>8 | 0         | 0        | 0             | 133   | 145 | Carbamidomethylation                                        | PEAKS DB  |
| K.SMTC(+57.02)NFIAPVVC(+57.02)K.F         | Y    | 41.55  | 1672.7776 | 14     | -3.8  | 837.3929 | 2 | 11.67 | 5        | 291<br>9 | 0         | 0        | 0             | 133   | 146 | Carbamidomethylation                                        | PEAKS DB  |
| K.SM(+15.99)TC(+57.02)NFIAPVVC(+57.02)K.F | Y    | 41.20  | 1541.7041 | 13     | -0.4  | 771.8590 | 2 | 8.70  | 5        | 206<br>0 | 0         | 0        | 0             | 133   | 145 | Oxidation (M); Carbamidomethylation                         | PEAKS PTM |
| K.SM(-48.00)TC(+57.02)NFIAPVVC(+57.02)K.F | Y    | 36.35  | 1477.7058 | 13     | -0.2  | 493.5758 | 3 | 7.72  | 5        | 177<br>2 | 0         | 0        | 0             | 133   | 145 | Dethiomethyl; Carbamidomethylation                          | PEAKS PTM |
| K.SM(+15.99)TC(+57.02)NFIAPVVC(+57.02)K.F | Y    | 33.60  | 1688.7725 | 14     | 2.2   | 845.3953 | 2 | 11.07 | 5        | 276<br>2 | 0         | 0        | 0             | 133   | 146 | Oxidation (M); Carbamidomethylation                         | PEAKS PTM |
| K.ALAAE(+57.02)SYC(+57.02)LIMITHEKEWK.S   | Y    | 31.48  | 2407.1553 | 19     | 0.1   | 602.7961 | 4 | 9.23  | 5        | 222<br>2 | 0         | 0        | 0             | 114   | 132 | Carbamidomethylation (DHKE, X@N-term); Carbamidomethylation | PEAKS PTM |



| Peptide                                           | Uniq | -10lgP | Mass      | Length | ppm  | m/z      | z | RT    | Fraction | Scan | Area SVMP | #Feature | #Feature SVMP | Start | End | PTM                                                                              | Found By  |
|---------------------------------------------------|------|--------|-----------|--------|------|----------|---|-------|----------|------|-----------|----------|---------------|-------|-----|----------------------------------------------------------------------------------|-----------|
| K.ALAEESYC(+57.02)LIMITHEK(+43.01).E              | Y    | 30.05  | 1949.9226 | 16     | -0.9 | 650.9809 | 3 | 9.92  | 5        | 2444 | 0         | 0        | 0             | 114   | 129 | Carbamidomethylation;<br>Carbamylation                                           | PEAKS PTM |
| K.S(+43.01)MTC(+57.02)NFIAPVVC(+57.02)K(+57.02)F  | Y    | 26.79  | 1772.8048 | 14     | -2.2 | 887.4077 | 2 | 11.13 | 5        | 2780 | 0         | 0        | 0             | 133   | 146 | Carbamylation;<br>Carbamidomethylation;<br>Carbamidomethylation (DHKE, X@N-term) | PEAKS PTM |
| K.SM(-48.00)TC(+57.02)NFIAPVVC(+57.02)KF          | Y    | 26.43  | 1624.7742 | 14     | -2.8 | 813.3921 | 2 | 10.09 | 5        | 2493 | 0         | 0        | 0             | 133   | 146 | Dethiomethyl;<br>Carbamidomethylation                                            | PEAKS PTM |
| N.F(+57.02)IAPVVC(+57.02)KF                       | Y    | 26.00  | 1136.6052 | 9      | -4.3 | 569.3074 | 2 | 10.77 | 5        | 2678 | 0         | 0        | 0             | 138   | 146 | Carbamidomethylation (DHKE, X@N-term);<br>Carbamidomethylation                   | PEAKS PTM |
| K.S(+100.02)MTC(+57.02)NFIAPVVC(+57.02)K.F        | Y    | 25.88  | 1625.7252 | 13     | 7.5  | 813.8760 | 2 | 8.90  | 5        | 2119 | 0         | 0        | 0             | 133   | 145 | Methylmalonylation on Serine;<br>Carbamidomethylation                            | PEAKS PTM |
| A.VLDC(+57.02)PSGWLSYEQH.C                        | Y    | 25.78  | 1689.7457 | 14     | -0.2 | 845.8800 | 2 | 9.79  | 5        | 2397 | 0         | 0        | 0             | 24    | 37  | Carbamidomethylation                                                             | PEAKS DB  |
| K.S(+57.02)MTC(+57.02)NFIAPVVC(+57.02)KF          | Y    | 25.76  | 1729.7990 | 14     | 1.6  | 865.9081 | 2 | 11.83 | 5        | 2960 | 0         | 0        | 0             | 133   | 146 | Carbamidomethylation (DHKE, X@N-term);<br>Carbamidomethylation                   | PEAKS PTM |
| M.T(+57.02)C(+57.02)NFIAPVVC(+57.02)KF            | Y    | 25.72  | 1511.7264 | 12     | -3.2 | 756.8680 | 2 | 11.19 | 5        | 2800 | 0         | 0        | 0             | 135   | 146 | Carbamidomethylation (DHKE, X@N-term);<br>Carbamidomethylation                   | PEAKS PTM |
| K.S(+42.01)M(+15.99)TC(+57.02)NFIAPVVC(+57.02)K.F | Y    | 25.70  | 1583.7146 | 13     | -4.6 | 792.8610 | 2 | 8.38  | 5        | 1962 | 0         | 0        | 0             | 133   | 145 | Acetylation (N-term); Oxidation (M);<br>Carbamidomethylation                     | PEAKS PTM |
| total 21 peptides                                 |      |        |           |        |      |          |   |       |          |      |           |          |               |       |     |                                                                                  |           |

Supplementary Data S2: Sequence of RvPLA<sub>2</sub>

- a. Protein identification for RvPLA<sub>2</sub>. P31100 was determined to be the identity of PLA<sub>2</sub>. The determination was made based on analysis of -10lgP value, number of unique peptides and matched origin species.

| Protein Group | Protein ID | Accession                              | -10lgP | Coverage (%) | Coverage (%) P1 | Area P1 | #Peptides | #Unique | #Spec P1 | PTM | Avg. Mass | Description                                                            |
|---------------|------------|----------------------------------------|--------|--------------|-----------------|---------|-----------|---------|----------|-----|-----------|------------------------------------------------------------------------|
| 1             | 5933       | <a href="#">P31100 PA2A7_DABSI</a>     | 220.06 | 88           | 88              | 0       | 17        | 13      | 80       | Y   | 15421     | Acidic phospholipase A2 RV-7 OS=Daboia siamensis PE=1 SV=1             |
| 1             | 5932       | <a href="#">tr B3RFI6 B3RFI6_9SAUR</a> | 220.06 | 88           | 88              | 0       | 17        | 13      | 80       | Y   | 15421     | Acidic phospholipase A2 OS=Daboia russellii limitis PE=2 SV=1          |
| 2             | 5929       | <a href="#">tr B2YHV1 B2YHV1_DABSI</a> | 199.54 | 75           | 75              | 0       | 18        | 18      | 77       | Y   | 15555     | Basic phospholipase A2 OS=Daboia siamensis GN=PLA2 S1 PE=2 SV=1        |
| 2             | 5930       | <a href="#">Q02471 PA2B4_DABSI</a>     | 199.54 | 75           | 75              | 0       | 18        | 18      | 77       | Y   | 15555     | Basic phospholipase A2 RV-4 OS=Daboia siamensis PE=1 SV=1              |
| 3             | 5935       | <a href="#">tr Q6A3N6 Q6A3N6_VIPAZ</a> | 121.89 | 50           | 50              | 0       | 6         | 2       | 13       | Y   | 15421     | Vaspin acidic subunit (2) iso form OS=Vipera aspis zinnikeri PE=2 SV=1 |

**Supporting Peptides:**

| Peptide                                                                            | Uniq | -10lgP | Mass      | Length | ppm  | m/z       | z | RT    | Fraction | Scan | Source File           | Area P1 | #Feature | Start | End | PTM                                    | Found By  |
|------------------------------------------------------------------------------------|------|--------|-----------|--------|------|-----------|---|-------|----------|------|-----------------------|---------|----------|-------|-----|----------------------------------------|-----------|
| K.EVVHSYAIYGC(+57.02)YC(+57.02)GWGGQGR.A                                           | Y    | 72.37  | 2317.9998 | 20     | 5.2  | 773.6779  | 3 | 8.77  | 3        | 1977 | P1-aMSMS-30(47)-1uL.d | 0       | 0        | 32    | 51  | Carbamidomethylation                   | PEAKS DB  |
| K.TGKEVVHSYAIYGC(+57.02)YC(+57.02)GWGGQGR.A                                        | Y    | 70.21  | 2604.1638 | 23     | 0.3  | 869.0621  | 3 | 8.30  | 3        | 1847 | P1-aMSMS-30(47)-1uL.d | 0       | 0        | 29    | 51  | Carbamidomethylation                   | PEAKS DB  |
| K.TATYSYSFEN(+.98)GDIVC(+57.02)GDNDLC(+57.02)LR.T                                  | Y    | 52.73  | 2670.1213 | 23     | 0.0  | 891.0477  | 3 | 10.32 | 3        | 2457 | P1-aMSMS-30(47)-1uL.d | 0       | 0        | 77    | 99  | Deamidation (NQ); Carbamidomethylation | PEAKS PTM |
| G.NLFQFGEMILEKTGK.E                                                                | Y    | 52.50  | 1753.9072 | 15     | 2.0  | 877.9626  | 2 | 13.34 | 3        | 3183 | P1-aMSMS-30(47)-1uL.d | 0       | 0        | 17    | 31  |                                        | PEAKS DB  |
| R.TVC(+57.02)EC(+57.02)DRAAAIC(+57.02)LGQNVNTYDKNYEYYSISHC(+57.02)TEEESEQC(+57.02) | Y    | 47.30  | 4736.9458 | 39     | -3.7 | 1185.2394 | 4 | 9.21  | 3        | 2117 | P1-aMSMS-30(47)-1uL.d | 0       | 0        | 100   | 138 | Carbamidomethylation                   | PEAKS DB  |
| D.ATDRC(+57.02)C(+57.02)FVHDC(+57.02)C(+57.02)YGTVNDC(+57.02)NPK.T                 | Y    | 45.62  | 2748.0608 | 22     | 3.6  | 688.0250  | 4 | 6.00  | 3        | 1172 | P1-aMSMS-30(47)-1uL.d | 0       | 0        | 55    | 76  | Carbamidomethylation                   | PEAKS DB  |
| R.C(+57.02)C(+57.02)FVHDC(+57.02)C(+57.02)YGTVNDC(+57.02)NPK.T                     | Y    | 45.06  | 2304.8479 | 18     | -0.4 | 769.2896  | 3 | 6.19  | 3        | 1237 | P1-aMSMS-30(47)-1uL.d | 0       | 0        | 59    | 76  | Carbamidomethylation                   | PEAKS DB  |
| R.AAAIC(+57.02)LGQNVNTYDKNYEYYSISHC(+57.02)TEEESEQC(+57.02)                        | Y    | 41.95  | 3816.5977 | 32     | -1.3 | 1273.2048 | 3 | 9.73  | 3        | 2283 | P1-aMSMS-30(47)-1uL.d | 0       | 0        | 107   | 138 | Carbamidomethylation                   | PEAKS DB  |

| Peptide                                                   | Uniq | -10lgP | Mass      | Length | ppm   | m/z       | z | RT    | Fraction | Scan | Source File           | Area P1 | #Feature | Start | End | PTM                                                           | Found By  |
|-----------------------------------------------------------|------|--------|-----------|--------|-------|-----------|---|-------|----------|------|-----------------------|---------|----------|-------|-----|---------------------------------------------------------------|-----------|
| G.NLFQFGEMILEK.T                                          | Y    | 41.68  | 1467.7432 | 12     | 7.1   | 734.8841  | 2 | 13.59 | 3        | 3242 | P1-aMSMS-30(47)-1uL.d | 0       | 0        | 17    | 28  |                                                               | PEAKS DB  |
| Y.AIYGC(+57.02)YC(+57.02)GWGGQGR.A                        | N    | 41.01  | 1603.6660 | 14     | 3.0   | 802.8427  | 2 | 7.75  | 3        | 1692 | P1-aMSMS-30(47)-1uL.d | 0       | 0        | 38    | 51  | Carbamidomet hylation                                         | PEAKS DB  |
| K.NYEYYSISHC(+57.02)TEEEQC(+57.02)                        | N    | 40.36  | 2197.8206 | 17     | -2.2  | 1099.9152 | 2 | 6.89  | 3        | 1442 | P1-aMSMS-30(47)-1uL.d | 0       | 0        | 122   | 138 | Carbamidomet hylation                                         | PEAKS DB  |
| K.TATYSYSFEN(+.98)GDIVC(+57.02)GD(-18.01)NDLC(+57.02)LR.T | Y    | 36.71  | 2652.1108 | 23     | 1.1   | 885.0452  | 3 | 10.53 | 3        | 2522 | P1-aMSMS-30(47)-1uL.d | 0       | 0        | 77    | 99  | Deamidation (NQ); Carbamidomet hylation ; Dehydr ation        | PEAKS PTM |
| K.EVVH(+57.02)SYAIYGC(+57.02)YC(+57.02)GWGGQGR.A          | Y    | 32.74  | 2375.0212 | 20     | -1.1  | 792.6801  | 3 | 8.76  | 3        | 1973 | P1-aMSMS-30(47)-1uL.d | 0       | 0        | 32    | 51  | Carbamidomet hylation (DHKE, X@N-term); Carbamidomet hylation | PEAKS PTM |
| R.TVC(+57.02)EC(+57.02)DRAAAIC(+57.02)LGQNVNTYDK.N        | Y    | 31.80  | 2557.1360 | 22     | -15.5 | 853.3727  | 3 | 7.82  | 3        | 1714 | P1-aMSMS-30(47)-1uL.d | 0       | 0        | 100   | 121 | Carbamidomet hylation                                         | PEAKS DB  |
| K.EVVHSYAIYGC(+57.02)Y(-2.02)C(+57.02)GWGGQGR.A           | Y    | 31.56  | 2315.9841 | 20     | -6.2  | 772.9972  | 3 | 8.82  | 3        | 1994 | P1-aMSMS-30(47)-1uL.d | 0       | 0        | 32    | 51  | Carbamidomet hylation ; 2-                                    | PEAKS PTM |

| Peptide                                                                       | Uniq | -10lgP | Mass      | Length | ppm   | m/z      | z | RT   | Fraction | Scan | Source File           | Area P1 | #Feature | Start | End | PTM                                                            | Found By  |
|-------------------------------------------------------------------------------|------|--------|-----------|--------|-------|----------|---|------|----------|------|-----------------------|---------|----------|-------|-----|----------------------------------------------------------------|-----------|
|                                                                               |      |        |           |        |       |          |   |      |          |      |                       |         |          |       |     | amino-3-oxo-butanoinc_acid                                     |           |
| R.AQD(+57.02)ATDRC(+57.02)C(+57.02)FVHDC(+57.02)C(+57.02)YGTVNDC(+57.02)NPK.T | Y    | 31.13  | 3119.2048 | 25     | 6.2   | 780.8133 | 4 | 6.13 | 3        | 1212 | P1-aMSMS-30(47)-1uL.d | 0       | 0        | 52    | 76  | Carbamidomet hylation (DHKE, X@N-term); Carbamidomet hylation  | PEAKS PTM |
| Y.SFEN(+.98)GDIVC(+57.02)GDNDLC(+57.02)LR.T                                   | N    | 30.37  | 1983.8302 | 17     | 4.7   | 992.9271 | 2 | 9.29 | 3        | 2148 | P1-aMSMS-30(47)-1uL.d | 0       | 0        | 83    | 99  | Deamidation (NQ); Carbamidomet hylation                        | PEAKS PTM |
| R.C(+57.02)C(+57.02)FVH(+40.03)DC(+57.02)C(+57.02)YGTVNDC(+57.02)NPK.T        | Y    | 30.30  | 2344.8792 | 18     | -11.5 | 782.6246 | 3 | 7.71 | 3        | 1679 | P1-aMSMS-30(47)-1uL.d | 0       | 0        | 59    | 76  | Carbamidomet hylation ; Propion aldehyde +40                   | PEAKS PTM |
| R.AQDATDRC(+57.02)C(+57.02)FVH(+57.02)DC(+57.02)C(+57.02)YGTVNDC(+57.02)NPK.T | Y    | 29.73  | 3119.2048 | 25     | 8.0   | 780.8147 | 4 | 6.11 | 3        | 1209 | P1-aMSMS-30(47)-1uL.d | 0       | 0        | 52    | 76  | Carbamidomet hylation ; Carbamidomet hylation (DHKE, X@N-term) | PEAKS PTM |
| Y.SFED(sub N)GDIVC(+57.02)GDNDLC(+57.02)LR.T                                  | N    | 29.68  | 1983.8302 | 17     | 5.5   | 992.9279 | 2 | 9.27 | 3        | 2143 | P1-aMSMS-             | 0       | 0        | 83    | 99  | Carbamidomet hylation                                          | SPIDER    |

| Peptide                                                                        | Uniq | -10lgP | Mass       | Length | ppm  | m/z      | z | RT   | Fraction | Scan | Source File           | Area P1 | #Feature | Start | End | PTM                                                              | Found By  |
|--------------------------------------------------------------------------------|------|--------|------------|--------|------|----------|---|------|----------|------|-----------------------|---------|----------|-------|-----|------------------------------------------------------------------|-----------|
| R.AQDATDRC(+57.02)C(+57.02)FVHDC(+57.02)C(+57.02)YGT(-18.01)VNDC(+57.02)NP K.T | Y    | 27.36  | 3044 .1729 | 25     | 9.9  | 762.0580 | 4 | 6.17 | 3        | 1230 | P1-aMSMS-30(47)-1uL.d | 0       | 0        | 52    | 76  | Carbam idomet hylation ; Dehydr ation                            | PEAKS PTM |
| R.AAAIC(+57.02)LGQNV NTYDK.N                                                   | Y    | 26.88  | 1636 .7878 | 15     | 3.0  | 819.4037 | 2 | 7.52 | 3        | 1627 | P1-aMSMS-30(47)-1uL.d | 0       | 0        | 107   | 121 | Carbam idomet hylation                                           | PEAKS DB  |
| R.C(+57.02)(+57.02)C(+57.02)FVHDC(+57.02)C(+57.02)YGTVNDC(+57.02)NPK.T         | Y    | 25.46  | 2361 .8694 | 18     | -2.6 | 788.2950 | 3 | 6.53 | 3        | 1344 | P1-aMSMS-30(47)-1uL.d | 0       | 0        | 59    | 76  | Carbam idomet hylation ; Carbam idomet hylation (DHKE, X@N-term) | PEAKS PTM |
| D.RC(+57.02)C(+57.02)FVHDC(+57.02)C(+57.02)YGTVNDC(+57.02)NPK .T               | Y    | 25.37  | 2460 .9490 | 19     | 10.1 | 616.2507 | 4 | 5.72 | 3        | 1084 | P1-aMSMS-30(47)-1uL.d | 0       | 0        | 58    | 76  | Carbam idomet hylation                                           | PEAKS DB  |
| K.EVVHSY(+125.90)AIY GC(+57.02)YC(+57.02)GWGGQGR.A                             | Y    | 25.14  | 2443 .8962 | 20     | 4.3  | 815.6428 | 3 | 9.94 | 3        | 2349 | P1-aMSMS-30(47)-1uL.d | 0       | 0        | 32    | 51  | Iodinati on; Carbam idomet hylation                              | PEAKS PTM |
| total 27 peptides                                                              |      |        |            |        |      |          |   |      |          |      |                       |         |          |       |     |                                                                  |           |
